# Supplementary material
Source: MDPI journal article supplement (https://www.mdpi.com/1996-1073/16/11/4498)
Supplement: s1 [file s1]

## Supplementary materials

**Table S1:** Steel production by each pathway included in FTT:Steel. In Mtcs/y.

|                         | China  |        |        |        |        |        |        |        |        |        |        |        |        |        |        |        |
|-------------------------|--------|--------|--------|--------|--------|--------|--------|--------|--------|--------|--------|--------|--------|--------|--------|--------|
|                         | S0     |        |        |        | S1     |        |        |        | S2     |        |        |        | S3     |        |        |        |
|                         | 2022   | 2030   | 2040   | 2050   | 2022   | 2030   | 2040   | 2050   | 2022   | 2030   | 2040   | 2050   | 2022   | 2030   | 2040   | 2050   |
| BF - OHF                | 0.0    | 0.0    | 0.0    | 0.0    | 0.0    | 0.0    | 0.0    | 0.0    | 0.0    | 0.0    | 0.0    | 0.0    | 0.0    | 0.0    | 0.0    | 0.0    |
| BF - BOF                | 902.6  | 929.2  | 832.1  | 756.8  | 907.3  | 914.3  | 702.1  | 509.6  | 907.2  | 876.3  | 595.5  | 343.5  | 906.3  | 758.9  | 293.6  | 22.9   |
| BF - BOF (BB)           | 0.5    | 0.4    | 0.3    | 0.2    | 0.0    | 0.0    | 0.0    | 0.0    | 0.0    | 0.1    | 0.1    | 0.2    | 0.1    | 0.2    | 0.3    | 0.3    |
| BF - BOF (CCS)          | 1.1    | 0.7    | 0.3    | 0.2    | 0.1    | 7.1    | 25.2   | 50.0   | 0.1    | 11.6   | 44.5   | 98.6   | 0.3    | 41.3   | 112.9  | 158.8  |
| BF - BOF (CCS, BB)      | 0.4    | 0.2    | 0.1    | 0.1    | 0.0    | 0.0    | 0.0    | 0.1    | 0.0    | 0.0    | 0.1    | 0.2    | 0.1    | 0.2    | 0.3    | 0.5    |
| BF TGR - BOF (CCS)      | 0.8    | 1.6    | 0.9    | 0.5    | 0.0    | 0.1    | 0.2    | 0.3    | 0.0    | 0.3    | 0.5    | 1.1    | 0.2    | 1.1    | 1.7    | 2.4    |
| BF TGR - BOF (CCS, BB)  | 0.3    | 0.5    | 0.2    | 0.1    | 0.0    | 0.0    | 0.1    | 0.1    | 0.0    | 0.1    | 0.2    | 0.3    | 0.1    | 0.4    | 0.6    | 1.1    |
| DR-gas - EAF            | 0.3    | 0.2    | 0.1    | 0.1    | 0.3    | 0.3    | 0.3    | 0.3    | 0.3    | 0.2    | 0.1    | 0.1    | 0.3    | 0.2    | 0.1    | 0.0    |
| DR-gas - EAF (BB)       | 0.3    | 0.9    | 0.9    | 1.1    | 0.0    | 0.1    | 0.1    | 0.2    | 0.0    | 0.1    | 0.2    | 0.5    | 0.1    | 0.4    | 0.8    | 1.5    |
| DR-gas - EAF (CCS)      | 0.2    | 0.2    | 0.1    | 0.0    | 0.0    | 0.0    | 0.0    | 0.0    | 0.0    | 0.1    | 0.1    | 0.1    | 0.0    | 0.2    | 0.2    | 0.2    |
| DR-gas - EAF (CCS, BB)  | 0.1    | 0.1    | 0.0    | 0.0    | 0.0    | 0.0    | 0.0    | 0.0    | 0.0    | 0.0    | 0.0    | 0.1    | 0.0    | 0.1    | 0.1    | 0.2    |
| DR-coal - EAF           | 0.0    | 0.0    | 0.0    | 0.0    | 0.0    | 0.0    | 0.0    | 0.0    | 0.0    | 0.0    | 0.0    | 0.0    | 0.0    | 0.0    | 0.0    | 0.0    |
| DR-coal - EAF (BB)      | 0.3    | 0.5    | 0.3    | 0.2    | 0.0    | 0.0    | 0.0    | 0.1    | 0.0    | 0.1    | 0.2    | 0.3    | 0.1    | 0.3    | 0.5    | 0.6    |
| DR-coal - EAF (CCS)     | 0.2    | 0.3    | 0.1    | 0.0    | 0.0    | 0.0    | 0.0    | 0.0    | 0.0    | 0.1    | 0.1    | 0.2    | 0.0    | 0.2    | 0.3    | 0.3    |
| DR-coal - EAF (CCS, BB) | 0.1    | 0.1    | 0.0    | 0.0    | 0.0    | 0.0    | 0.0    | 0.0    | 0.0    | 0.0    | 0.0    | 0.0    | 0.0    | 0.1    | 0.1    | 0.4    |
| SR - BOF                | 6.0    | 11.8   | 23.3   | 46.9   | 6.1    | 10.9   | 14.7   | 16.6   | 6.1    | 7.1    | 5.2    | 3.2    | 6.1    | 6.8    | 3.8    | 1.6    |
| SR - BOF (BB)           | 0.3    | 1.0    | 1.1    | 1.5    | 0.0    | 0.1    | 0.1    | 0.2    | 0.0    | 0.1    | 0.2    | 0.6    | 0.1    | 0.4    | 0.8    | 1.9    |
| SR - BOF (CCS)          | 0.2    | 0.6    | 0.7    | 0.9    | 0.0    | 0.0    | 0.1    | 0.2    | 0.0    | 0.1    | 0.2    | 0.4    | 0.0    | 0.3    | 0.6    | 1.3    |
| SR - BOF (CCS, BB)      | 0.1    | 0.1    | 0.1    | 0.1    | 0.0    | 0.0    | 0.0    | 0.1    | 0.0    | 0.0    | 0.0    | 0.1    | 0.0    | 0.1    | 0.3    | 1.1    |
| SR + - BOF              | 0.8    | 4.0    | 6.7    | 11.4   | 0.0    | 0.2    | 0.2    | 0.2    | 0.0    | 0.1    | 0.1    | 0.0    | 0.2    | 0.6    | 0.2    | 0.1    |
| SR + - BOF (BB)         | 0.3    | 0.8    | 0.7    | 0.8    | 0.0    | 0.1    | 0.1    | 0.2    | 0.0    | 0.1    | 0.2    | 0.4    | 0.1    | 0.4    | 0.7    | 1.4    |
| SR + - BOF (CCS)        | 0.0    | 0.5    | 0.4    | 0.3    | 0.0    | 8.7    | 34.2   | 73.9   | 0.0    | 12.9   | 52.1   | 130.4  | 0.0    | 48.0   | 142.6  | 253.3  |
| SR + - BOF (CCS, BB)    | 0.0    | 0.1    | 0.0    | 0.0    | 0.0    | 0.0    | 0.0    | 0.1    | 0.0    | 0.0    | 0.0    | 0.1    | 0.0    | 0.1    | 0.2    | 0.7    |
| DR-H2 - EAF             | 0.0    | 3.7    | 1.5    | 0.5    | 0.0    | 10.4   | 49.0   | 137.1  | 0.0    | 15.6   | 72.8   | 156.9  | 0.0    | 70.4   | 223.0  | 264.1  |
| Electrolysis            | 0.0    | 0.0    | 1.4    | 0.4    | 0.0    | 0.0    | 1.1    | 11.6   | 0.0    | 0.0    | 1.8    | 22.2   | 0.0    | 0.0    | 6.5    | 54.2   |
| Scrap - EAF             | 94.8   | 140.6  | 214.9  | 252.6  | 95.3   | 171.9  | 265.4  | 281.1  | 95.3   | 199.8  | 319.1  | 322.9  | 95.2   | 198.6  | 312.3  | 317.7  |
| Total                   | 1009.3 | 1098.0 | 1086.3 | 1074.9 | 1009.3 | 1124.3 | 1093.1 | 1082.4 | 1009.3 | 1124.7 | 1093.4 | 1082.3 | 1009.3 | 1129.3 | 1102.6 | 1086.4 |

|                         | Japan |      |      |      |      |      |      |      |      |      |      |      |      |      |      |      |
|-------------------------|-------|------|------|------|------|------|------|------|------|------|------|------|------|------|------|------|
|                         | S0    |      |      |      | S1   |      |      |      | S2   |      |      |      | S3   |      |      |      |
|                         | 2022  | 2030 | 2040 | 2050 | 2022 | 2030 | 2040 | 2050 | 2022 | 2030 | 2040 | 2050 | 2022 | 2030 | 2040 | 2050 |
| BF - OHF                | 0.0   | 0.0  | 0.0  | 0.0  | 0.0  | 0.0  | 0.0  | 0.0  | 0.0  | 0.0  | 0.0  | 0.0  | 0.0  | 0.0  | 0.0  | 0.0  |
| BF - BOF                | 63.8  | 49.2 | 40.0 | 35.9 | 64.3 | 50.1 | 37.5 | 28.4 | 64.3 | 46.8 | 29.2 | 16.4 | 64.3 | 42.1 | 16.9 | 3.4  |
| BF - BOF (BB)           | 0.0   | 0.0  | 0.0  | 0.0  | 0.0  | 0.0  | 0.0  | 0.0  | 0.0  | 0.0  | 0.0  | 0.0  | 0.0  | 0.0  | 0.0  | 0.0  |
| BF - BOF (CCS)          | 0.1   | 0.1  | 0.0  | 0.0  | 0.0  | 0.4  | 1.5  | 2.7  | 0.0  | 0.7  | 2.6  | 5.3  | 0.0  | 1.9  | 5.7  | 7.7  |
| BF - BOF (CCS, BB)      | 0.0   | 0.0  | 0.0  | 0.0  | 0.0  | 0.0  | 0.0  | 0.0  | 0.0  | 0.0  | 0.0  | 0.0  | 0.0  | 0.0  | 0.0  | 0.0  |
| BF TGR - BOF (CCS)      | 0.1   | 0.2  | 0.1  | 0.1  | 0.0  | 0.0  | 0.0  | 0.0  | 0.0  | 0.0  | 0.0  | 0.0  | 0.0  | 0.0  | 0.1  | 0.1  |
| BF TGR - BOF (CCS, BB)  | 0.0   | 0.0  | 0.0  | 0.0  | 0.0  | 0.0  | 0.0  | 0.0  | 0.0  | 0.0  | 0.0  | 0.0  | 0.0  | 0.0  | 0.0  | 0.0  |
| DR-gas - EAF            | 0.1   | 0.3  | 0.3  | 0.5  | 0.0  | 0.0  | 0.0  | 0.0  | 0.0  | 0.0  | 0.0  | 0.0  | 0.0  | 0.0  | 0.0  | 0.0  |
| DR-gas - EAF (BB)       | 0.0   | 0.1  | 0.1  | 0.1  | 0.0  | 0.0  | 0.0  | 0.0  | 0.0  | 0.0  | 0.0  | 0.0  | 0.0  | 0.0  | 0.0  | 0.0  |
| DR-gas - EAF (CCS)      | 0.0   | 0.0  | 0.0  | 0.0  | 0.0  | 0.0  | 0.0  | 0.0  | 0.0  | 0.0  | 0.0  | 0.0  | 0.0  | 0.0  | 0.0  | 0.0  |
| DR-gas - EAF (CCS, BB)  | 0.0   | 0.0  | 0.0  | 0.0  | 0.0  | 0.0  | 0.0  | 0.0  | 0.0  | 0.0  | 0.0  | 0.0  | 0.0  | 0.0  | 0.0  | 0.0  |
| DR-coal - EAF           | 0.1   | 0.3  | 0.4  | 0.6  | 0.0  | 0.0  | 0.0  | 0.0  | 0.0  | 0.0  | 0.0  | 0.0  | 0.0  | 0.0  | 0.0  | 0.0  |
| DR-coal - EAF (BB)      | 0.0   | 0.1  | 0.1  | 0.1  | 0.0  | 0.0  | 0.0  | 0.0  | 0.0  | 0.0  | 0.0  | 0.0  | 0.0  | 0.0  | 0.0  | 0.0  |
| DR-coal - EAF (CCS)     | 0.0   | 0.0  | 0.1  | 0.1  | 0.0  | 0.0  | 0.0  | 0.0  | 0.0  | 0.0  | 0.0  | 0.0  | 0.0  | 0.0  | 0.0  | 0.0  |
| DR-coal - EAF (CCS, BB) | 0.0   | 0.0  | 0.0  | 0.0  | 0.0  | 0.0  | 0.0  | 0.0  | 0.0  | 0.0  | 0.0  | 0.0  | 0.0  | 0.0  | 0.0  | 0.0  |
| SR - BOF                | 2.3   | 2.9  | 3.9  | 5.6  | 2.3  | 3.0  | 3.7  | 4.2  | 2.3  | 2.0  | 1.4  | 0.9  | 2.3  | 2.0  | 1.2  | 0.5  |
| SR - BOF (BB)           | 0.0   | 0.0  | 0.0  | 0.0  | 0.0  | 0.0  | 0.0  | 0.0  | 0.0  | 0.0  | 0.0  | 0.0  | 0.0  | 0.0  | 0.0  | 0.0  |
| SR - BOF (CCS)          | 0.0   | 0.1  | 0.1  | 0.1  | 0.0  | 0.0  | 0.0  | 0.0  | 0.0  | 0.0  | 0.0  | 0.0  | 0.0  | 0.0  | 0.0  | 0.0  |
| SR - BOF (CCS, BB)      | 0.0   | 0.0  | 0.0  | 0.0  | 0.0  | 0.0  | 0.0  | 0.0  | 0.0  | 0.0  | 0.0  | 0.0  | 0.0  | 0.0  | 0.0  | 0.0  |
| SR + - BOF              | 0.1   | 0.2  | 0.3  | 0.4  | 0.0  | 0.0  | 0.0  | 0.0  | 0.0  | 0.0  | 0.0  | 0.0  | 0.0  | 0.0  | 0.0  | 0.0  |
| SR + - BOF (BB)         | 0.0   | 0.0  | 0.0  | 0.0  | 0.0  | 0.0  | 0.0  | 0.0  | 0.0  | 0.0  | 0.0  | 0.0  | 0.0  | 0.0  | 0.0  | 0.0  |
| SR + - BOF (CCS)        | 0.0   | 0.0  | 0.1  | 0.1  | 0.0  | 0.5  | 1.7  | 3.1  | 0.0  | 0.7  | 2.7  | 6.0  | 0.0  | 2.1  | 6.7  | 10.7 |
| SR + - BOF (CCS, BB)    | 0.0   | 0.0  | 0.0  | 0.0  | 0.0  | 0.0  | 0.0  | 0.0  | 0.0  | 0.0  | 0.0  | 0.0  | 0.0  | 0.0  | 0.0  | 0.0  |
| DR-H2 - EAF             | 0.0   | 0.9  | 1.0  | 0.9  | 0.0  | 0.6  | 2.4  | 5.5  | 0.0  | 0.9  | 3.9  | 9.3  | 0.0  | 3.1  | 11.0 | 17.7 |
| Electrolysis            | 0.0   | 0.0  | 0.1  | 0.1  | 0.0  | 0.0  | 0.1  | 0.7  | 0.0  | 0.0  | 0.1  | 1.4  | 0.0  | 0.0  | 0.2  | 1.5  |
| Scrap - EAF             | 23.0  | 34.3 | 40.2 | 41.7 | 23.1 | 35.1 | 40.3 | 41.5 | 23.1 | 38.5 | 47.1 | 46.9 | 23.1 | 38.4 | 45.4 | 44.4 |
| Total                   | 89.8  | 88.8 | 86.9 | 86.2 | 89.8 | 89.9 | 87.2 | 86.3 | 89.8 | 89.7 | 87.1 | 86.2 | 89.8 | 89.9 | 87.3 | 86.2 |
|                         | Korea |      |      |      |      |      |      |      |      |      |      |      |      |      |      |      |
|                         | S0    |      |      |      | S1   |      |      |      | S2   |      |      |      | S3   |      |      |      |
|                         | 2022  | 2030 | 2040 | 2050 | 2022 | 2030 | 2040 | 2050 | 2022 | 2030 | 2040 | 2050 | 2022 | 2030 | 2040 | 2050 |
| BF - OHF                | 0.0   | 0.0  | 0.0  | 0.0  | 0.0  | 0.0  | 0.0  | 0.0  | 0.0  | 0.0  | 0.0  | 0.0  | 0.0  | 0.0  | 0.0  | 0.0  |

|                         |      |      |      |      |      |      |      |      |      |      |      |      |      |      |      |      |
|-------------------------|------|------|------|------|------|------|------|------|------|------|------|------|------|------|------|------|
| BF - BOF                | 39.8 | 41.0 | 37.0 | 31.8 | 40.1 | 33.5 | 21.2 | 10.7 | 40.1 | 29.7 | 14.0 | 4.4  | 40.1 | 28.1 | 11.2 | 2.2  |
| BF - BOF (BB)           | 0.0  | 0.0  | 0.0  | 0.0  | 0.0  | 0.0  | 0.0  | 0.0  | 0.0  | 0.0  | 0.0  | 0.0  | 0.0  | 0.0  | 0.0  | 0.0  |
| BF - BOF (CCS)          | 0.1  | 0.1  | 0.0  | 0.0  | 0.0  | 0.8  | 2.9  | 5.6  | 0.0  | 0.8  | 3.7  | 8.1  | 0.0  | 1.0  | 4.3  | 8.2  |
| BF - BOF (CCS, BB)      | 0.0  | 0.0  | 0.0  | 0.0  | 0.0  | 0.0  | 0.0  | 0.0  | 0.0  | 0.0  | 0.0  | 0.0  | 0.0  | 0.0  | 0.0  | 0.0  |
| BF TGR - BOF (CCS)      | 0.1  | 0.1  | 0.1  | 0.0  | 0.0  | 0.0  | 0.0  | 0.0  | 0.0  | 0.0  | 0.0  | 0.1  | 0.0  | 0.0  | 0.1  | 0.1  |
| BF TGR - BOF (CCS, BB)  | 0.0  | 0.0  | 0.0  | 0.0  | 0.0  | 0.0  | 0.0  | 0.0  | 0.0  | 0.0  | 0.0  | 0.0  | 0.0  | 0.0  | 0.0  | 0.0  |
| DR-gas - EAF            | 0.1  | 0.1  | 0.1  | 0.1  | 0.0  | 0.0  | 0.0  | 0.0  | 0.0  | 0.0  | 0.0  | 0.0  | 0.0  | 0.0  | 0.0  | 0.0  |
| DR-gas - EAF (BB)       | 0.0  | 0.0  | 0.0  | 0.0  | 0.0  | 0.0  | 0.0  | 0.0  | 0.0  | 0.0  | 0.0  | 0.0  | 0.0  | 0.0  | 0.0  | 0.0  |
| DR-gas - EAF (CCS)      | 0.0  | 0.0  | 0.0  | 0.0  | 0.0  | 0.0  | 0.0  | 0.0  | 0.0  | 0.0  | 0.0  | 0.0  | 0.0  | 0.0  | 0.0  | 0.0  |
| DR-gas - EAF (CCS, BB)  | 0.0  | 0.0  | 0.0  | 0.0  | 0.0  | 0.0  | 0.0  | 0.0  | 0.0  | 0.0  | 0.0  | 0.0  | 0.0  | 0.0  | 0.0  | 0.0  |
| DR-coal - EAF           | 0.1  | 0.2  | 0.2  | 0.2  | 0.0  | 0.0  | 0.0  | 0.0  | 0.0  | 0.0  | 0.0  | 0.0  | 0.0  | 0.0  | 0.0  | 0.0  |
| DR-coal - EAF (BB)      | 0.0  | 0.0  | 0.0  | 0.0  | 0.0  | 0.0  | 0.0  | 0.0  | 0.0  | 0.0  | 0.0  | 0.0  | 0.0  | 0.0  | 0.0  | 0.0  |
| DR-coal - EAF (CCS)     | 0.0  | 0.0  | 0.0  | 0.0  | 0.0  | 0.0  | 0.0  | 0.0  | 0.0  | 0.0  | 0.0  | 0.0  | 0.0  | 0.0  | 0.0  | 0.0  |
| DR-coal - EAF (CCS, BB) | 0.0  | 0.0  | 0.0  | 0.0  | 0.0  | 0.0  | 0.0  | 0.0  | 0.0  | 0.0  | 0.0  | 0.0  | 0.0  | 0.0  | 0.0  | 0.0  |
| SR - BOF                | 1.3  | 2.1  | 3.2  | 4.6  | 1.3  | 1.6  | 1.3  | 0.8  | 1.3  | 1.2  | 0.7  | 0.3  | 1.3  | 1.1  | 0.6  | 0.2  |
| SR - BOF (BB)           | 0.0  | 0.0  | 0.0  | 0.0  | 0.0  | 0.0  | 0.0  | 0.0  | 0.0  | 0.0  | 0.0  | 0.0  | 0.0  | 0.0  | 0.0  | 0.0  |
| SR - BOF (CCS)          | 0.0  | 0.0  | 0.1  | 0.1  | 0.0  | 0.0  | 0.0  | 0.0  | 0.0  | 0.0  | 0.0  | 0.1  | 0.0  | 0.0  | 0.0  | 0.1  |
| SR - BOF (CCS, BB)      | 0.0  | 0.0  | 0.0  | 0.0  | 0.0  | 0.0  | 0.0  | 0.0  | 0.0  | 0.0  | 0.0  | 0.0  | 0.0  | 0.0  | 0.0  | 0.0  |
| SR + - BOF              | 2.4  | 2.6  | 2.5  | 2.3  | 2.4  | 2.2  | 1.3  | 0.7  | 2.4  | 1.6  | 0.7  | 0.2  | 2.4  | 1.6  | 0.6  | 0.2  |
| SR + - BOF (BB)         | 0.0  | 0.0  | 0.0  | 0.0  | 0.0  | 0.0  | 0.0  | 0.0  | 0.0  | 0.0  | 0.0  | 0.0  | 0.0  | 0.0  | 0.0  | 0.0  |
| SR + - BOF (CCS)        | 0.0  | 0.0  | 0.0  | 0.0  | 0.0  | 0.9  | 3.6  | 7.3  | 0.0  | 1.0  | 4.4  | 10.2 | 0.0  | 1.3  | 5.5  | 10.9 |
| SR + - BOF (CCS, BB)    | 0.0  | 0.0  | 0.0  | 0.0  | 0.0  | 0.0  | 0.0  | 0.0  | 0.0  | 0.0  | 0.0  | 0.0  | 0.0  | 0.0  | 0.0  | 0.0  |
| DR-H2 - EAF             | 0.0  | 0.1  | 0.0  | 0.0  | 0.0  | 0.9  | 3.4  | 5.7  | 0.0  | 1.1  | 4.2  | 4.8  | 0.0  | 1.7  | 6.3  | 6.8  |
| Electrolysis            | 0.0  | 0.0  | 0.1  | 0.0  | 0.0  | 0.0  | 0.1  | 0.9  | 0.0  | 0.0  | 0.1  | 1.1  | 0.0  | 0.0  | 0.1  | 1.0  |
| Scrap - EAF             | 21.6 | 23.1 | 26.2 | 27.7 | 21.6 | 30.3 | 35.7 | 35.2 | 21.6 | 34.7 | 41.7 | 37.7 | 21.6 | 35.4 | 40.8 | 37.2 |
| Total                   | 65.5 | 69.7 | 69.6 | 67.0 | 65.6 | 70.2 | 69.6 | 67.0 | 65.6 | 70.1 | 69.5 | 66.9 | 65.6 | 70.2 | 69.6 | 66.9 |

**Table S2:** Employment by technology in thousand FTE.

|                         | China  |        |        |        |        |        |        |        |        |        |        |        |        |        |        |        |
|-------------------------|--------|--------|--------|--------|--------|--------|--------|--------|--------|--------|--------|--------|--------|--------|--------|--------|
|                         | S0     |        |        |        | S1     |        |        |        | S2     |        |        |        | S3     |        |        |        |
|                         | 2022   | 2030   | 2040   | 2050   | 2022   | 2030   | 2040   | 2050   | 2022   | 2030   | 2040   | 2050   | 2022   | 2030   | 2040   | 2050   |
| BF - OHF                | 0      | 0      | 0      | 0      | 0      | 0      | 0      | 0      | 0      | 0      | 0      | 0      | 0      | 0      | 0      | 0      |
| BF - BOF                | 1161   | 1195.2 | 1070.4 | 973.41 | 1167.1 | 1176.1 | 903.05 | 655.52 | 1167   | 1127.2 | 766.03 | 441.81 | 1165.7 | 976.19 | 377.66 | 29.404 |
| BF - BOF (BB)           | 0.6044 | 0.5017 | 0.3596 | 0.278  | 0.0273 | 0.028  | 0.0306 | 0.0337 | 0.0364 | 0.0675 | 0.1367 | 0.2843 | 0.1515 | 0.271  | 0.3493 | 0.3426 |
| BF - BOF (CCS)          | 1.4973 | 0.903  | 0.4505 | 0.2476 | 0.0676 | 9.5294 | 34.071 | 67.489 | 0.0901 | 15.72  | 60.077 | 133.19 | 0.3754 | 55.785 | 152.48 | 214.44 |
| BF - BOF (CCS, BB)      | 0.5912 | 0.3235 | 0.1453 | 0.0739 | 0.0267 | 0.0279 | 0.0472 | 0.0851 | 0.0356 | 0.06   | 0.1154 | 0.2069 | 0.1482 | 0.2535 | 0.4187 | 0.7337 |
| BF TGR - BOF (CCS)      | 1.0805 | 2.2228 | 1.2118 | 0.7248 | 0.0487 | 0.1789 | 0.288  | 0.4597 | 0.0649 | 0.3705 | 0.7518 | 1.484  | 0.2704 | 1.5303 | 2.3585 | 3.31   |
| BF TGR - BOF (CCS, BB)  | 0.3616 | 0.6801 | 0.3311 | 0.1822 | 0.0163 | 0.0584 | 0.1028 | 0.1896 | 0.0217 | 0.1196 | 0.2335 | 0.436  | 0.0905 | 0.5014 | 0.8549 | 1.5679 |
| DR-gas - EAF            | 0.4174 | 0.2999 | 0.1727 | 0.1312 | 0.4204 | 0.4148 | 0.4324 | 0.4772 | 0.4204 | 0.3385 | 0.191  | 0.0881 | 0.4199 | 0.3349 | 0.14   | 0.039  |
| DR-gas - EAF (BB)       | 0.4393 | 1.4591 | 1.5144 | 1.8242 | 0.0198 | 0.0948 | 0.1752 | 0.3238 | 0.0264 | 0.1624 | 0.3446 | 0.7938 | 0.11   | 0.6769 | 1.2349 | 2.4484 |
| DR-gas - EAF (CCS)      | 0.2919 | 0.3922 | 0.1122 | 0.0391 | 0.0132 | 0.0296 | 0.0275 | 0.0304 | 0.0175 | 0.0926 | 0.1611 | 0.2352 | 0.0731 | 0.3733 | 0.4219 | 0.3434 |
| DR-gas - EAF (CCS, BB)  | 0.0987 | 0.1605 | 0.0624 | 0.0292 | 0.0045 | 0.0162 | 0.0276 | 0.051  | 0.0059 | 0.0325 | 0.0591 | 0.0987 | 0.0247 | 0.1381 | 0.2271 | 0.39   |
| DR-coal - EAF           | 0.0111 | 0.013  | 0.0126 | 0.0131 | 0.0112 | 0.0118 | 0.0073 | 0.004  | 0.0112 | 0.0102 | 0.0058 | 0.0027 | 0.0111 | 0.0097 | 0.004  | 0.0011 |
| DR-coal - EAF (BB)      | 0.3206 | 0.6238 | 0.3057 | 0.2335 | 0.0144 | 0.0454 | 0.0601 | 0.0897 | 0.0193 | 0.1032 | 0.1886 | 0.3475 | 0.0802 | 0.4247 | 0.5731 | 0.786  |
| DR-coal - EAF (CCS)     | 0.2209 | 0.3518 | 0.1282 | 0.0545 | 0.01   | 0.029  | 0.0345 | 0.0428 | 0.0133 | 0.0716 | 0.1306 | 0.2139 | 0.0553 | 0.292  | 0.359  | 0.3425 |
| DR-coal - EAF (CCS, BB) | 0.0732 | 0.0928 | 0.0254 | 0.0094 | 0.0033 | 0.0094 | 0.0176 | 0.0454 | 0.0044 | 0.0219 | 0.0371 | 0.0538 | 0.0183 | 0.0933 | 0.1733 | 0.4498 |
| SR - BOF                | 10.535 | 20.519 | 40.631 | 81.877 | 10.599 | 19.031 | 25.631 | 29.033 | 10.598 | 12.338 | 8.9919 | 5.5843 | 10.588 | 11.85  | 6.7056 | 2.7195 |
| SR - BOF (BB)           | 0.4733 | 1.6719 | 1.954  | 2.68   | 0.0213 | 0.1061 | 0.2118 | 0.4322 | 0.0284 | 0.1761 | 0.3944 | 0.9863 | 0.1185 | 0.7382 | 1.4706 | 3.3597 |
| SR - BOF (CCS)          | 0.3299 | 1.1394 | 1.2766 | 1.5794 | 0.0149 | 0.0818 | 0.1739 | 0.3624 | 0.0198 | 0.1306 | 0.3134 | 0.7975 | 0.0826 | 0.5426 | 1.1095 | 2.31   |
| SR - BOF (CCS, BB)      | 0.1077 | 0.2434 | 0.1626 | 0.1383 | 0.0049 | 0.0256 | 0.0725 | 0.253  | 0.0065 | 0.0377 | 0.0787 | 0.1692 | 0.027  | 0.1736 | 0.5173 | 2.0074 |
| SR + - BOF              | 1.3529 | 6.5639 | 10.946 | 18.729 | 0.061  | 0.2863 | 0.3663 | 0.3904 | 0.0813 | 0.2261 | 0.1276 | 0.059  | 0.3387 | 0.9061 | 0.3782 | 0.106  |
| SR + - BOF (BB)         | 0.4385 | 1.2949 | 1.1712 | 1.2773 | 0.0198 | 0.0892 | 0.1606 | 0.2924 | 0.0264 | 0.1541 | 0.3137 | 0.7014 | 0.1098 | 0.6466 | 1.137  | 2.2819 |
| SR + - BOF (CCS)        | 0      | 0.8162 | 0.6069 | 0.5106 | 0      | 15.007 | 58.716 | 127.08 | 0      | 22.188 | 89.561 | 224.08 | 0      | 82.565 | 245.09 | 435.29 |
| SR + - BOF (CCS, BB)    | 0      | 0.1832 | 0.0789 | 0.0439 | 0      | 0.02   | 0.0471 | 0.139  | 0      | 0.0332 | 0.0612 | 0.1102 | 0      | 0.1455 | 0.3489 | 1.1266 |
| DR-H2 - EAF             | 0      | 4.5177 | 1.857  | 0.6519 | 0      | 12.703 | 59.838 | 167.27 | 0      | 18.971 | 88.824 | 191.39 | 0      | 85.901 | 272.11 | 322.19 |
| Electrolysis            | 0      | 0      | 2.0857 | 0.5665 | 0      | 0      | 1.6825 | 17.436 | 0      | 0      | 2.7028 | 33.309 | 0      | 0      | 9.7148 | 81.233 |
| Scrap - EAF             | 113.97 | 169.05 | 258.46 | 303.84 | 114.67 | 206.73 | 319.16 | 338.13 | 114.66 | 240.28 | 383.83 | 388.31 | 114.55 | 238.81 | 375.58 | 382.07 |
| Total                   | 1294.2 | 1409.2 | 1394.4 | 1389.1 | 1293.1 | 1440.6 | 1404.4 | 1405.7 | 1293.1 | 1438.9 | 1403.7 | 1424.7 | 1293.4 | 1459.2 | 1451.4 | 1489.3 |
| Japan                   |        |        |        |        |        |        |        |        |        |        |        |        |        |        |        |        |
|                         | S0     |        |        |        | S1     |        |        |        | S2     |        |        |        | S3     |        |        |        |

|                         | 2022   | 2030   | 2040   | 2050   | 2022   | 2030   | 2040   | 2050   | 2022   | 2030   | 2040   | 2050   | 2022   | 2030   | 2040   | 2050   |
|-------------------------|--------|--------|--------|--------|--------|--------|--------|--------|--------|--------|--------|--------|--------|--------|--------|--------|
| BF - OHF                | 0      | 0      | 0      | 0      | 0      | 0      | 0      | 0      | 0      | 0      | 0      | 0      | 0      | 0      | 0      | 0      |
| BF - BOF                | 77.643 | 59.85  | 48.7   | 43.712 | 78.313 | 61.035 | 45.637 | 34.618 | 78.303 | 56.935 | 35.513 | 19.928 | 78.232 | 51.304 | 20.548 | 4.1247 |
| BF - BOF (BB)           | 0.0478 | 0.0242 | 0.013  | 0.0081 | 0.0017 | 0.001  | 0.0007 | 0.0005 | 0.0024 | 0.0027 | 0.0045 | 0.0069 | 0.0072 | 0.0079 | 0.0098 | 0.0085 |
| BF - BOF (CCS)          | 0.1293 | 0.0814 | 0.0579 | 0.046  | 0.0046 | 0.569  | 1.8922 | 3.5077 | 0.0065 | 0.8802 | 3.2869 | 6.7714 | 0.0195 | 2.389  | 7.242  | 9.8816 |
| BF - BOF (CCS, BB)      | 0.0495 | 0.0238 | 0.0125 | 0.0076 | 0.0017 | 0.0013 | 0.0016 | 0.0021 | 0.0025 | 0.0028 | 0.0046 | 0.0071 | 0.0075 | 0.0083 | 0.011  | 0.0115 |
| BF TGR - BOF (CCS)      | 0.0917 | 0.2159 | 0.1856 | 0.175  | 0.0032 | 0.0112 | 0.016  | 0.0225 | 0.0046 | 0.0182 | 0.0319 | 0.0553 | 0.0138 | 0.0549 | 0.077  | 0.0894 |
| BF TGR - BOF (CCS, BB)  | 0.0303 | 0.0537 | 0.0326 | 0.0226 | 0.0011 | 0.003  | 0.0041 | 0.0056 | 0.0015 | 0.0057 | 0.0096 | 0.0152 | 0.0046 | 0.0171 | 0.0234 | 0.0267 |
| DR-gas - EAF            | 0.101  | 0.3578 | 0.4741 | 0.6634 | 0.0035 | 0.0137 | 0.0187 | 0.0252 | 0.0051 | 0.0107 | 0.0055 | 0.0026 | 0.0152 | 0.0316 | 0.0135 | 0.0044 |
| DR-gas - EAF (BB)       | 0.0331 | 0.0864 | 0.0815 | 0.0818 | 0.0012 | 0.0039 | 0.0049 | 0.006  | 0.0017 | 0.0061 | 0.0095 | 0.015  | 0.005  | 0.0184 | 0.0236 | 0.027  |
| DR-gas - EAF (CCS)      | 0.0232 | 0.0637 | 0.0637 | 0.0673 | 0.0008 | 0.003  | 0.004  | 0.0053 | 0.0012 | 0.0045 | 0.0072 | 0.0119 | 0.0035 | 0.0134 | 0.0182 | 0.0219 |
| DR-gas - EAF (CCS, BB)  | 0.0075 | 0.0134 | 0.0082 | 0.0055 | 0.0003 | 0.0008 | 0.001  | 0.0012 | 0.0004 | 0.0013 | 0.002  | 0.0028 | 0.0011 | 0.0041 | 0.0049 | 0.0049 |
| DR-coal - EAF           | 0.0761 | 0.2907 | 0.4148 | 0.6264 | 0.0027 | 0.0104 | 0.0139 | 0.0177 | 0.0038 | 0.0081 | 0.0042 | 0.002  | 0.0114 | 0.0239 | 0.0102 | 0.0034 |
| DR-coal - EAF (BB)      | 0.0248 | 0.065  | 0.0614 | 0.0614 | 0.0009 | 0.0029 | 0.0037 | 0.0045 | 0.0012 | 0.0046 | 0.0071 | 0.0112 | 0.0037 | 0.0137 | 0.0176 | 0.0201 |
| DR-coal - EAF (CCS)     | 0.0175 | 0.0542 | 0.0617 | 0.0739 | 0.0006 | 0.0023 | 0.0032 | 0.0043 | 0.0009 | 0.0034 | 0.0056 | 0.0098 | 0.0026 | 0.0102 | 0.0144 | 0.0189 |
| DR-coal - EAF (CCS, BB) | 0.0056 | 0.0097 | 0.0058 | 0.0038 | 0.0002 | 0.0006 | 0.0008 | 0.001  | 0.0003 | 0.001  | 0.0015 | 0.0021 | 0.0008 | 0.003  | 0.004  | 0.0049 |
| SR - BOF                | 3.7689 | 4.7057 | 6.353  | 9.0908 | 3.8061 | 4.8617 | 5.9458 | 6.8012 | 3.8057 | 3.2811 | 2.251  | 1.4267 | 3.8024 | 3.2222 | 1.8839 | 0.8868 |
| SR - BOF (BB)           | 0.0377 | 0.0633 | 0.0352 | 0.0225 | 0.0013 | 0.0029 | 0.0029 | 0.0032 | 0.0019 | 0.0069 | 0.0116 | 0.018  | 0.0057 | 0.0205 | 0.0263 | 0.0251 |
| SR - BOF (CCS)          | 0.0274 | 0.0927 | 0.1207 | 0.1668 | 0.001  | 0.0039 | 0.0061 | 0.0094 | 0.0014 | 0.0058 | 0.0107 | 0.0211 | 0.0041 | 0.0173 | 0.0275 | 0.0411 |
| SR - BOF (CCS, BB)      | 0.0088 | 0.0143 | 0.0079 | 0.005  | 0.0003 | 0.0009 | 0.0013 | 0.0019 | 0.0004 | 0.0016 | 0.0027 | 0.0042 | 0.0013 | 0.0049 | 0.0073 | 0.0108 |
| SR + - BOF              | 0.1112 | 0.3701 | 0.4379 | 0.5468 | 0.0039 | 0.0135 | 0.0153 | 0.016  | 0.0056 | 0.0117 | 0.006  | 0.0028 | 0.0167 | 0.0344 | 0.0147 | 0.0048 |
| SR + - BOF (BB)         | 0.0351 | 0.0501 | 0.0225 | 0.0116 | 0.0012 | 0.0025 | 0.0023 | 0.0023 | 0.0018 | 0.0058 | 0.0085 | 0.0112 | 0.0053 | 0.0174 | 0.0188 | 0.0147 |
| SR + - BOF (CCS)        | 0      | 0.0793 | 0.0893 | 0.1063 | 0      | 0.8268 | 2.7241 | 4.9936 | 0      | 1.1894 | 4.3886 | 9.6324 | 0      | 3.4133 | 10.717 | 17.131 |
| SR + - BOF (CCS, BB)    | 0      | 0.0126 | 0.0055 | 0.0027 | 0      | 0.0008 | 0.001  | 0.0013 | 0      | 0.0015 | 0.0022 | 0.0028 | 0      | 0.0044 | 0.0056 | 0.0068 |
| DR-H2 - EAF             | 0      | 1.0664 | 1.1487 | 1.0574 | 0      | 0.7327 | 2.8845 | 6.5436 | 0      | 1.0539 | 4.6424 | 11.026 | 0      | 3.7391 | 13.118 | 21.088 |
| Electrolysis            | 0      | 0      | 0.1884 | 0.077  | 0      | 0      | 0.0996 | 0.9969 | 0      | 0      | 0.1749 | 2.0967 | 0      | 0      | 0.286  | 2.283  |
| Scrap - EAF             | 27.685 | 41.283 | 48.35  | 50.168 | 27.742 | 42.242 | 48.417 | 49.966 | 27.741 | 46.297 | 56.703 | 56.357 | 27.735 | 46.177 | 54.625 | 53.385 |
| Total                   | 109.95 | 108.93 | 106.93 | 106.81 | 109.89 | 110.35 | 107.7  | 107.56 | 109.89 | 109.74 | 107.09 | 107.44 | 109.9  | 110.55 | 108.75 | 109.12 |
|                         | Korea  |        |        |        |        |        |        |        |        |        |        |        |        |        |        |        |
|                         | S0     |        |        |        | S1     |        |        |        | S2     |        |        |        | S3     |        |        |        |
|                         | 2022   | 2030   | 2040   | 2050   | 2022   | 2030   | 2040   | 2050   | 2022   | 2030   | 2040   | 2050   | 2022   | 2030   | 2040   | 2050   |
| BF - OHF                | 0      | 0      | 0      | 0      | 0      | 0      | 0      | 0      | 0      | 0      | 0      | 0      | 0      | 0      | 0      | 0      |
| BF - BOF                | 48.459 | 49.887 | 44.987 | 38.753 | 48.867 | 40.801 | 25.779 | 13.054 | 48.867 | 36.177 | 17.067 | 5.3395 | 48.855 | 34.162 | 13.664 | 2.651  |
| BF - BOF (BB)           | 0.0345 | 0.0225 | 0.0123 | 0.0067 | 0.0026 | 0.0019 | 0.0015 | 0.0011 | 0.0026 | 0.0033 | 0.0059 | 0.0093 | 0.0035 | 0.0042 | 0.0052 | 0.0043 |

|                         |        |        |        |        |        |        |        |        |        |        |        |        |        |        |        |        |
|-------------------------|--------|--------|--------|--------|--------|--------|--------|--------|--------|--------|--------|--------|--------|--------|--------|--------|
| BF - BOF (CCS)          | 0.0911 | 0.0651 | 0.0417 | 0.0269 | 0.0069 | 0.9721 | 3.6785 | 7.1192 | 0.0069 | 1.0791 | 4.6907 | 10.33  | 0.0092 | 1.3337 | 5.5274 | 10.532 |
| BF - BOF (CCS, BB)      | 0.035  | 0.0195 | 0.0094 | 0.0046 | 0.0026 | 0.0026 | 0.005  | 0.0103 | 0.0026 | 0.0033 | 0.0057 | 0.0081 | 0.0035 | 0.0048 | 0.0106 | 0.0233 |
| BF TGR - BOF (CCS)      | 0.0655 | 0.1484 | 0.0937 | 0.0599 | 0.0049 | 0.0183 | 0.0332 | 0.0559 | 0.0049 | 0.0232 | 0.0536 | 0.1093 | 0.0066 | 0.0311 | 0.0651 | 0.116  |
| BF TGR - BOF (CCS, BB)  | 0.0218 | 0.0405 | 0.0197 | 0.0097 | 0.0016 | 0.0053 | 0.0102 | 0.0211 | 0.0016 | 0.0068 | 0.0121 | 0.0182 | 0.0022 | 0.0096 | 0.0215 | 0.0481 |
| DR-gas - EAF            | 0.0701 | 0.1839 | 0.1491 | 0.1172 | 0.0053 | 0.0168 | 0.0168 | 0.0142 | 0.0053 | 0.0104 | 0.0043 | 0.0013 | 0.007  | 0.014  | 0.0055 | 0.0015 |
| DR-gas - EAF (BB)       | 0.0227 | 0.0322 | 0.0106 | 0.0035 | 0.0017 | 0.0031 | 0.0018 | 0.001  | 0.0017 | 0.006  | 0.0067 | 0.0052 | 0.0023 | 0.008  | 0.0082 | 0.0055 |
| DR-gas - EAF (CCS)      | 0.0159 | 0.0229 | 0.0077 | 0.0026 | 0.0012 | 0.0027 | 0.002  | 0.0013 | 0.0012 | 0.0045 | 0.0055 | 0.0043 | 0.0016 | 0.006  | 0.0067 | 0.0047 |
| DR-gas - EAF (CCS, BB)  | 0.0053 | 0.0062 | 0.0015 | 0.0004 | 0.0004 | 0.0006 | 0.0003 | 0.0001 | 0.0004 | 0.0013 | 0.0013 | 0.0008 | 0.0005 | 0.0017 | 0.0016 | 0.001  |
| DR-coal - EAF           | 0.0537 | 0.1852 | 0.212  | 0.2289 | 0.004  | 0.0131 | 0.0101 | 0.0062 | 0.004  | 0.0083 | 0.0035 | 0.001  | 0.0054 | 0.011  | 0.0043 | 0.0012 |
| DR-coal - EAF (BB)      | 0.0174 | 0.032  | 0.016  | 0.0079 | 0.0013 | 0.0033 | 0.003  | 0.0025 | 0.0013 | 0.005  | 0.0067 | 0.0066 | 0.0017 | 0.0068 | 0.0083 | 0.0075 |
| DR-coal - EAF (CCS)     | 0.012  | 0.0193 | 0.0078 | 0.0031 | 0.0009 | 0.0023 | 0.0019 | 0.0014 | 0.0009 | 0.0035 | 0.0046 | 0.004  | 0.0012 | 0.0047 | 0.0056 | 0.0042 |
| DR-coal - EAF (CCS, BB) | 0.004  | 0.005  | 0.0014 | 0.0004 | 0.0003 | 0.0006 | 0.0006 | 0.0006 | 0.0003 | 0.001  | 0.0011 | 0.0008 | 0.0004 | 0.0014 | 0.0018 | 0.0018 |
| SR - BOF                | 2.1317 | 3.3623 | 5.1471 | 7.4458 | 2.1523 | 2.5453 | 2.0998 | 1.3736 | 2.1523 | 1.8957 | 1.0828 | 0.4729 | 2.1519 | 1.8211 | 0.9865 | 0.3976 |
| SR- BOF (BB)            | 0.0272 | 0.0551 | 0.03   | 0.0165 | 0.002  | 0.0056 | 0.0066 | 0.0075 | 0.002  | 0.0084 | 0.0138 | 0.0191 | 0.0027 | 0.0113 | 0.0174 | 0.0223 |
| SR - BOF (CCS)          | 0.0197 | 0.0804 | 0.1185 | 0.1751 | 0.0015 | 0.0087 | 0.0239 | 0.0611 | 0.0015 | 0.0098 | 0.0332 | 0.1016 | 0.002  | 0.0129 | 0.0394 | 0.1039 |
| SR - BOF (CCS, BB)      | 0.0063 | 0.0124 | 0.0069 | 0.004  | 0.0005 | 0.0021 | 0.0072 | 0.0301 | 0.0005 | 0.002  | 0.0036 | 0.0052 | 0.0006 | 0.0034 | 0.0131 | 0.0586 |
| SR + - BOF              | 3.6851 | 3.9772 | 3.8878 | 3.5713 | 3.7208 | 3.2985 | 2.0352 | 1.0001 | 3.7208 | 2.5033 | 1.0376 | 0.315  | 3.7201 | 2.4265 | 0.9451 | 0.2614 |
| SR + - BOF (BB)         | 0.0252 | 0.0381 | 0.0137 | 0.005  | 0.0019 | 0.004  | 0.0034 | 0.0028 | 0.0019 | 0.0067 | 0.0086 | 0.0085 | 0.0025 | 0.0091 | 0.0108 | 0.0099 |
| SR + - BOF (CCS)        | 0      | 0.0534 | 0.0481 | 0.0431 | 0      | 1.4367 | 5.7105 | 11.661 | 0      | 1.5519 | 7.1166 | 16.35  | 0      | 2.0111 | 8.7606 | 17.479 |
| SR + - BOF (CCS, BB)    | 0      | 0.0097 | 0.0034 | 0.0013 | 0      | 0.0015 | 0.0038 | 0.0117 | 0      | 0.0017 | 0.0023 | 0.0023 | 0      | 0.0027 | 0.0076 | 0.0245 |
| DR-H2 - EAF             | 0      | 0.1189 | 0.049  | 0.015  | 0      | 1.124  | 4.0598 | 6.7297 | 0      | 1.278  | 4.9462 | 5.7074 | 0      | 1.9744 | 7.4891 | 8.0322 |
| Electrolysis            | 0      | 0      | 0.1305 | 0.0303 | 0      | 0      | 0.153  | 1.3365 | 0      | 0      | 0.1858 | 1.6293 | 0      | 0      | 0.1818 | 1.4283 |
| Scrap - EAF             | 25.963 | 27.828 | 31.471 | 33.284 | 26.014 | 36.472 | 42.948 | 42.341 | 26.014 | 41.689 | 50.126 | 45.353 | 26.013 | 42.524 | 49.097 | 44.773 |
| Total                   | 80.766 | 86.205 | 86.476 | 83.816 | 80.793 | 86.742 | 86.595 | 84.844 | 80.793 | 86.279 | 86.425 | 85.802 | 80.793 | 86.396 | 86.884 | 85.993 |

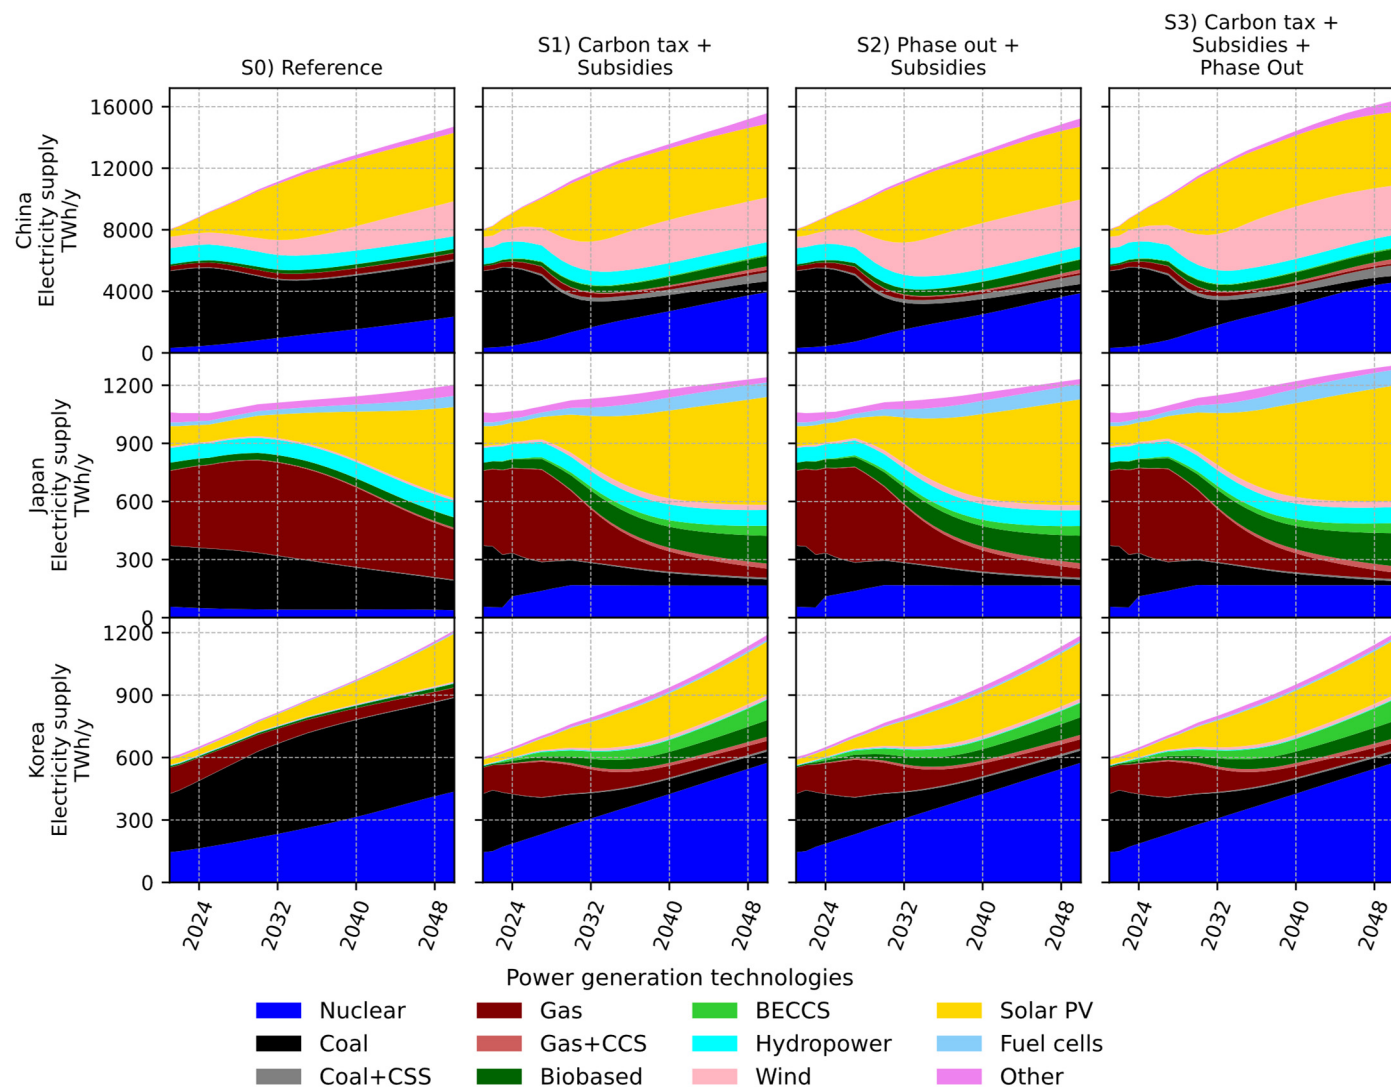

**Figure S1:** Technology diffusion in the power sector in each country and scenario.

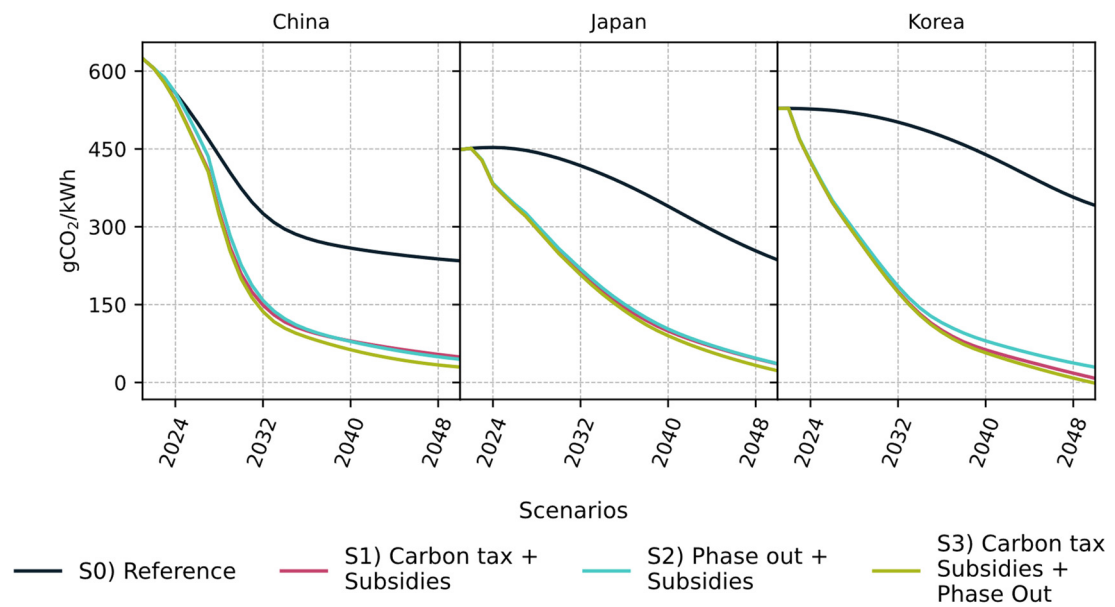

**Figure S2:** Power grid emission factors for each country and scenario.



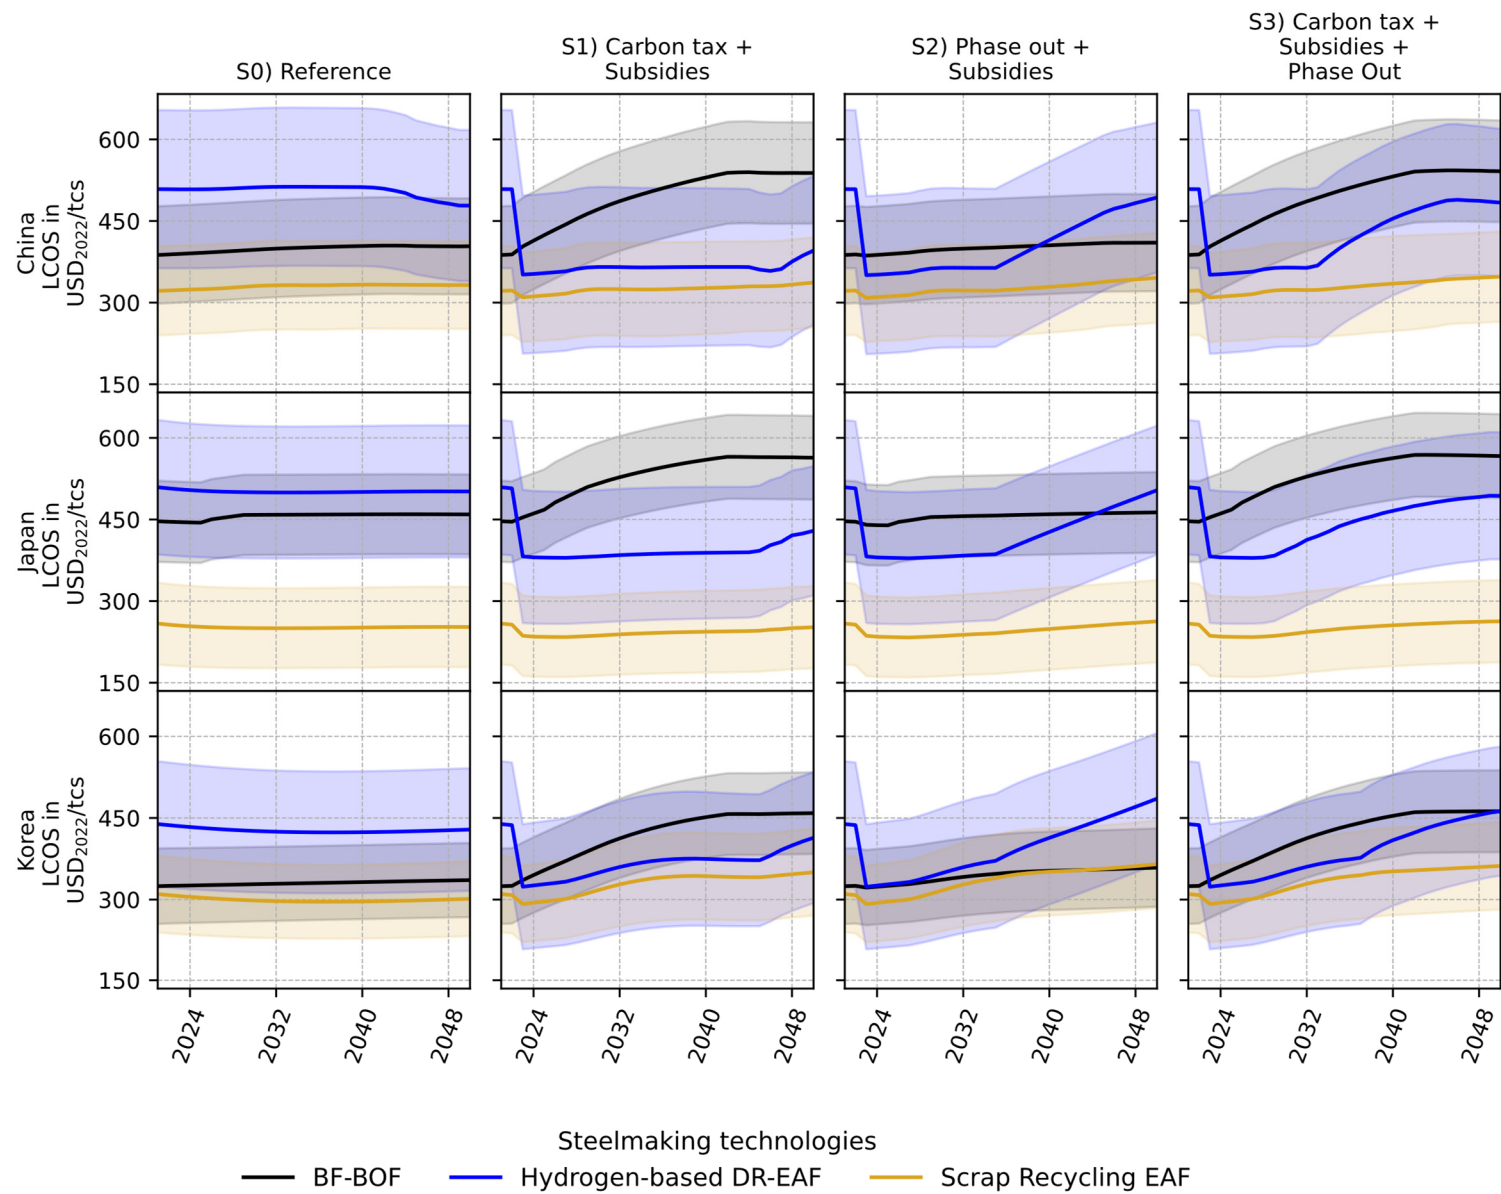

**Figure S3:** Levelised cost of crude steel (LCOS) for selected technologies in each country and scenario. Solid lines indicate mean values and shaded area indicates the confidence interval (2\*standard deviation).
